# Supplementary material
Source: PubMed Central journal article supplement (PMC3629384)

Figure S3

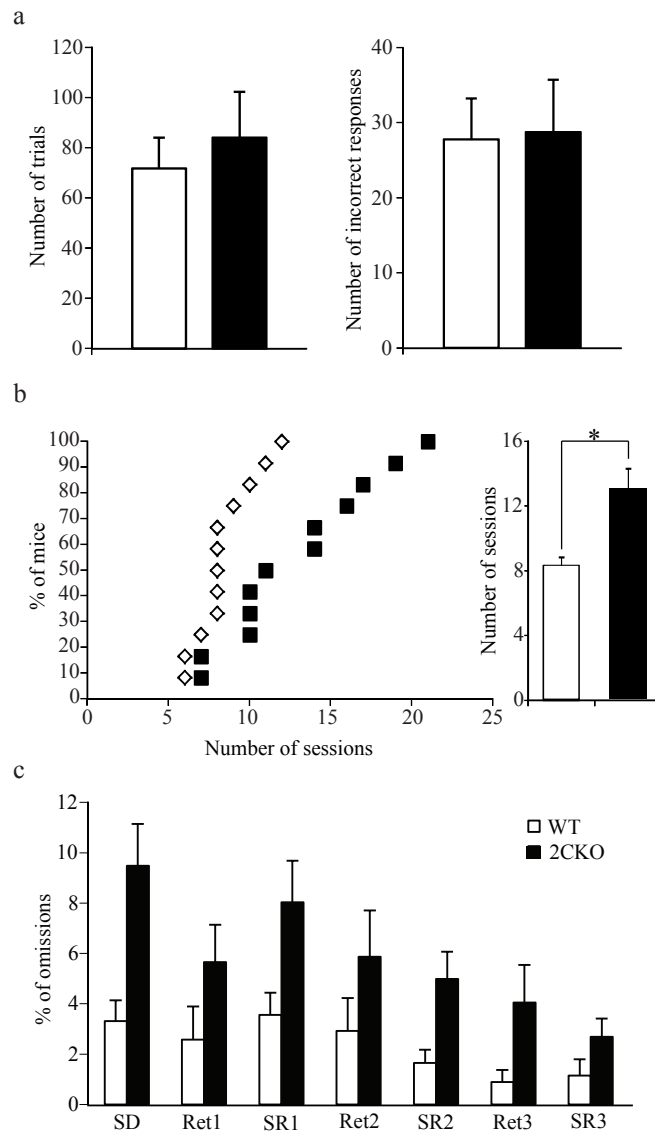

Supplement: npp2012258x5.pdf [file npp2012258x5.pdf]
